# Supplementary material for: Subsidized health insurance coverage of people in the informal sector and vulnerable population groups: trends in institutional design in Asia
Source: PubMed Central journal article supplement (PMC5050723; doi:10.1186/s12939-016-0436-3), 2016-10-04
Supplement: 12939_2016_436_MOESM1_ESM.pdf [file 12939_2016_436_MOESM1_ESM.pdf]

## Additional File 1. Degree of cost-sharing

| Country and arrangement | Cost-sharing                                                                                                                                                                                                                                                                                                                                                                                                                                                                                               | Same/ different to regularly insured population                            |
|-------------------------|------------------------------------------------------------------------------------------------------------------------------------------------------------------------------------------------------------------------------------------------------------------------------------------------------------------------------------------------------------------------------------------------------------------------------------------------------------------------------------------------------------|----------------------------------------------------------------------------|
|                         | Co-payments, co-insurance, deductibles, ceilings                                                                                                                                                                                                                                                                                                                                                                                                                                                           |                                                                            |
| Cambodia:               |                                                                                                                                                                                                                                                                                                                                                                                                                                                                                                            |                                                                            |
| -HEFs                   | No user fees (30)                                                                                                                                                                                                                                                                                                                                                                                                                                                                                          | n/a                                                                        |
| -SUBO                   | No user fees (40)<br>Flat rate per case (considered too low) (57)                                                                                                                                                                                                                                                                                                                                                                                                                                          | n/a                                                                        |
| China:                  |                                                                                                                                                                                                                                                                                                                                                                                                                                                                                                            |                                                                            |
| -URBMI                  | 50%-55% average cost-sharing of total health bill for inpatient costs (deductibles, coinsurance provisions, reimbursement caps; heterogeneous across regions); increases at higher care levels (42)                                                                                                                                                                                                                                                                                                        | Higher: in UEBMI 28-33% (66)                                               |
| -NRCMS                  | 2008: Ceiling at 20,000 CNY, reimbursement rate of 40% (78)<br>2012: Reimbursement rate for inpatient services at 75% (153)                                                                                                                                                                                                                                                                                                                                                                                | Lower ceiling than UEBMI (100,000 CNY) and URBMI (80,000 CNY) in 2008 (78) |
| India:                  |                                                                                                                                                                                                                                                                                                                                                                                                                                                                                                            |                                                                            |
| -RSBY                   | No co-payment, but ceiling (12, 24)<br>Inpatient services covered up to an annual ceiling of Rs. 30,000 per family, transport allowance up to Rs. 100/visit with a maximum of Rs. 1,000 per year (24)                                                                                                                                                                                                                                                                                                      | Different: ceiling (12)                                                    |
| -Yeshasvini             | Co-payment only for outpatient consultations at a network of hospitals (doctors' fees and 30% cost-sharing for diagnostics and tests).<br>Inpatient services covered up to a ceiling of Rs. 100,000 per procedure and Rs. 200,000 per year per person; in addition "pre-authorization" by a resident doctor by the third party administrator required (48, 65)<br>Beneficiaries are only entitled to general ward admission; if they opt for a higher bed category, they have to pay to the hospital (92). | Different (12)                                                             |
| -Rajiv Aarogyasri       | No co-payment (154)<br>Inpatient services covered up to a floater of Rs. 150,000 per family per year, in addition Rs. 50,000 as buffer for excess expenses on individual case basis.<br>58% of patients incur OOP average of Rs. 3,600 per patient (67).<br>Annual ceiling of hospital expenses of approx. US\$ 3,700 per family (155).                                                                                                                                                                    | Different (12)                                                             |
| -Kalaigarnar            | No co-payment, but ceiling (12, 24)<br>Inpatient services covered up to a floater of Rs. 100,000 per family for four years (12).                                                                                                                                                                                                                                                                                                                                                                           | Different (12)                                                             |
| -Vajapayee Arogyasri    | No co-payment, but ceiling (12, 24)                                                                                                                                                                                                                                                                                                                                                                                                                                                                        | n/a                                                                        |

| Country and arrangement | Cost-sharing                                                                                                                                                                                                                                                                                                                                                                                                          |                                                                                                                                                                     |
|-------------------------|-----------------------------------------------------------------------------------------------------------------------------------------------------------------------------------------------------------------------------------------------------------------------------------------------------------------------------------------------------------------------------------------------------------------------|---------------------------------------------------------------------------------------------------------------------------------------------------------------------|
|                         | Co-payments, co-insurance, deductibles, ceilings                                                                                                                                                                                                                                                                                                                                                                      | Same/ different to regularly insured population                                                                                                                     |
| Indonesia               | No official co-payment (33)                                                                                                                                                                                                                                                                                                                                                                                           | Same for Jamsostek: no cost-sharing<br>Different from Askes: cost-sharing required when services fall outside basic benefit package (33)                            |
| Mongolia                | Exemption for subsidized population except for nuclear diagnosis and computerized tomography scan, e.g. for children <16 years or <18 if a student, pensioners without any other income source than pension, parents looking after children <2 years, military personnel on active duty, persons specified in Article 18 of social welfare law, handicapped people >50% disability, women with >3 children, etc. (49) | Different<br>For contributors: 5-15% co-payments for inpatient services (10% secondary level, 15% at tertiary level); up to 50% for outpatient essential drugs (88) |
| Philippines             | Reimbursement up to a ceiling for the respective category (especially for inpatient care) (63)<br>Between 10-50% of cost sharing depending on the facility type due to balance billing (63).<br>Hospitalization may require a contribution (35)                                                                                                                                                                       | n/a                                                                                                                                                                 |
| Thailand                | Before 2006: 2% or 30 Bath per visit or admission (exemptions for: e.g., older persons, children < 12 years, the poor, etc.)<br>No cost-sharing until 2012<br>Since 2012: 30 Baht co-payment was reintroduced for patients who receive prescriptions and who are willing to pay. Exemptions for: e.g., the poor, older persons, , children < 12 years, etc. (36)                                                      | n/a                                                                                                                                                                 |
| Vietnam                 | In case of referral; 5% for the poor and ethnic minorities, 20% for the near-poor and informal sector, higher if referral by-passed<br>Maximum reimbursement for high-tech services of US\$ 35 (equal to 40 months of monthly minimum salary)<br>No ceiling for co-payments (15)                                                                                                                                      | Lower for the poor, pensioners, ethnic minorities and those receiving social protection allowance (15)                                                              |
